# Supplementary material for: Who Benefits from Fermented Food Consumption? A Comparative Analysis between Psychiatrically Ill and Psychiatrically Healthy Medical Students
Source: MDPI journal article supplement (doi:10.3390/ijerph19073861), 2022-03-24
Supplement: s1 [file s1]

## Supplementary Material S3

### Association between consumption of each fermented foodstuff and depressive symptoms in psychiatrically ill medical students

Table S3. Association between consumption of each fermented foodstuff and **depressive symptoms**

| Type of analysis                                                         | $\beta$ (95% CI), <i>p</i> -value       |                                         |
|--------------------------------------------------------------------------|-----------------------------------------|-----------------------------------------|
|                                                                          | Raw analysis                            | Adjusted analysis                       |
| <b>Cheese <sup>a</sup></b>                                               |                                         |                                         |
| Association                                                              | -0.23 (-0.65 to 0.19), <i>p</i> =0.26   | -0.25 (-0.69 to 0.20), <i>p</i> =0.25   |
| Interaction                                                              | <i>p</i> =0.042                         | <i>p</i> =0.037                         |
| <b>Yogurt, kefir and soured milk <sup>a</sup></b>                        |                                         |                                         |
| Association                                                              | -0.46 (-0.85 to -0.08), <i>p</i> =0.020 | -0.49 (-0.89 to -0.08), <i>p</i> =0.023 |
| Interaction                                                              | <i>p</i> =0.0026                        | <i>p</i> =0.0046                        |
| <b>Pickled cucumber and pickling juice <sup>a</sup></b>                  |                                         |                                         |
| Association                                                              | -0.19 (-0.61 to 0.24), <i>p</i> =0.37   | -0.27 (-0.71 to 0.18), <i>p</i> =0.23   |
| Interaction                                                              | <i>p</i> =0.28                          | <i>p</i> =0.12                          |
| <b>Probiotic dietary supplements and medicinal products <sup>a</sup></b> |                                         |                                         |
| Association                                                              | -0.19 (-0.61 to 0.23), <i>p</i> =0.36   | -0.30 (-0.72 to 0.12), <i>p</i> =0.15   |
| Interaction                                                              | <i>p</i> =0.93                          | <i>p</i> =0.57                          |

<sup>a</sup> Other fermented foodstuffs were not reported to be consumed by the psychiatrically-ill in the 7-day period of food recording.
