# Supplementary material for: Who Benefits from Fermented Food Consumption? A Comparative Analysis between Psychiatrically Ill and Psychiatrically Healthy Medical Students
Source: MDPI journal article supplement (doi:10.3390/ijerph19073861), 2022-03-24
Supplement: s1 [file s1]

## Supplementary Material S2

### Association between consumption of fermented food and depressive and anxiety symptoms in psychiatrically ill medical students – sensitivity analyses

Table S1. Association between consumption of fermented food and **depressive symptoms**

| Type of analysis                                                                         | $\beta$ (95% CI), <i>p</i> -value        |                                          |
|------------------------------------------------------------------------------------------|------------------------------------------|------------------------------------------|
|                                                                                          | Raw analysis                             | Adjusted analysis                        |
| A subgroup highly adherent to food recording – missing no single day (n=17)              |                                          |                                          |
| Association                                                                              | -0.50 (-0.98 to -0.02), <i>p</i> =0.042  | -0.56 (-1.01 to -0.10), <i>p</i> =0.023  |
| Interaction                                                                              | <i>p</i> =0.0024                         | <i>p</i> =0.0005                         |
| A subgroup highly adherent to food recording – declaring to miss no more than 10% (n=17) |                                          |                                          |
| Association                                                                              | -0.50 (-0.98 to -0.02), <i>p</i> =0.041  | -0.49 (-1.01 to 0.02), <i>p</i> =0.058   |
| Interaction                                                                              | <i>p</i> =0.0013                         | <i>p</i> =0.0002                         |
| Fermented food excluding probiotic dietary supplements and medicinal products (n=25)     |                                          |                                          |
| Association                                                                              | -0.54 (-0.90 to -0.18), <i>p</i> =0.0053 | -0.52 (-0.87 to -0.17), <i>p</i> =0.0064 |
| Interaction                                                                              | <i>p</i> =0.0001                         | <i>p</i> =0.0001                         |
| 3-day pre-exam food recording (n=25)                                                     |                                          |                                          |
| Association                                                                              | -0.44 (-0.83 to -0.05), <i>p</i> =0.028  | -0.48 (-0.87 to -0.09), <i>p</i> =0.019  |
| Interaction                                                                              | <i>p</i> =0.0023                         | <i>p</i> =0.0019                         |

Table S2. Association between consumption of fermented food and **anxiety symptoms**

| Type of analysis                                                                         | $\beta$ (95% CI), <i>p</i> -value     |                                       |
|------------------------------------------------------------------------------------------|---------------------------------------|---------------------------------------|
|                                                                                          | Raw analysis                          | Adjusted analysis                     |
| A subgroup highly adherent to food recording – missing no single day (n=17)              |                                       |                                       |
| Association                                                                              | 0.07 (-0.48 to 0.62), <i>p</i> =0.79  | -0.03 (-0.51 to 0.45), <i>p</i> =0.88 |
| Interaction                                                                              | <i>p</i> =0.61                        | <i>p</i> =0.37                        |
| A subgroup highly adherent to food recording – declaring to miss no more than 10% (n=17) |                                       |                                       |
| Association                                                                              | -0.22 (-0.76 to 0.31), <i>p</i> =0.39 | -0.21 (-0.74 to 0.32), <i>p</i> =0.38 |
| Interaction                                                                              | <i>p</i> =0.20                        | <i>p</i> =0.088                       |
| Fermented food excluding probiotic dietary supplements and medicinal products (n=25)     |                                       |                                       |
| Association                                                                              | -0.27 (-0.68 to 0.15), <i>p</i> =0.20 | -0.19 (-0.58 to 0.20), <i>p</i> =0.31 |
| Interaction                                                                              | <i>p</i> =0.061                       | <i>p</i> =0.065                       |
| 3-day pre-exam food recording (n=25)                                                     |                                       |                                       |
| Association                                                                              | -0.25 (-0.67 to 0.16), <i>p</i> =0.22 | -0.20 (-0.60 to 0.20), <i>p</i> =0.32 |
| Interaction                                                                              | <i>p</i> =0.073                       | <i>p</i> =0.054                       |
